# Supplementary material for: Toxicity of Per- and Polyfluoroalkyl Substances to Nematodes
Source: MDPI journal article supplement (doi:10.3390/toxics11070593), 2023-07-07
Supplement: s1 [file s1]

**Table S1** General description of the methodology and scope of work in referred *C. elegans* studies.

| Effect                                                                                                                                                                                                                                                      | Life stage | Exposure mode               | Pollutant  | Type                                                                                                                 | Ref  |
|-------------------------------------------------------------------------------------------------------------------------------------------------------------------------------------------------------------------------------------------------------------|------------|-----------------------------|------------|----------------------------------------------------------------------------------------------------------------------|------|
| Lethal, body length, reproduction behavior, bioaccumulation, in vivo apoptosis, in vivo ROS, in vivo antioxidant oxidase, expression of vitellinogen related genes, estrogen receptor-related genes, pro-apoptosis-related genes, antioxidant-related genes | L1 to L4   | Agar growth medium          | PFOS, PFBS | Wild-type Bristol N2 strain                                                                                          | [15] |
| Fat storage and lipid metabolism                                                                                                                                                                                                                            | F0 to F3   | Agar growth medium          | PFOA       | Wild-type Bristol N2 strain; <i>daf-2</i> mutant                                                                     | [24] |
| Behavior and locomotion effects, developmental delay, gene expression changes in reproduction, neuro system, detoxification-enzyme-associated genes, and VTG related                                                                                        | L1 to L4   | Agar growth medium          | HFPO-DA    | Wild-type Bristol N2 strain                                                                                          | [27] |
| Lethal, bioaccumulation, body growth, reproduction behavior, locomotion behavior, chemotaxis assay, lifespan, transgenerational reproduction, locomotion, and lifespan behavior                                                                             | L1 to L4   | Standard agar growth medium | PFOS       | Wild-type Bristol N2 strain                                                                                          | [28] |
| Lethal, bioaccumulation, reproduction behavior, growth, locomotion behavior, developmental defects, chemotaxis plasticity, and lifespan                                                                                                                     | L4         | Agar growth medium          | PFOA       | Wild-type Bristol N2 strain                                                                                          | [29] |
| Lethal, bioaccumulation, generation time, reproduction behavior, life span, locomotion behavior, body growth, chemotaxis plasticity, and transgenerational effect                                                                                           | L1 to L4   | Standard agar growth medium | PFBS       | Wild-type Bristol N2 strain                                                                                          | [30] |
| Lethal, bioaccumulation, reproduction behavior, locomotion behavior, chemotaxis plasticity, growth, and lifespan                                                                                                                                            | L4         | Agar growth medium          | PFBA       | Wild-type Bristol N2 strain                                                                                          | [31] |
| Lethal, body growth, locomotion behavior, chemotaxis, and neuron visual analysis                                                                                                                                                                            | L1         | Agar growth medium          | PFOS       | Wild-type Bristol N2 strain; OH2871 ( <i>gcy-5::GFP</i> ), OH10819 ( <i>unc-17::GFP</i> ), BZ555( <i>pDAT::GFP</i> ) | [32] |
| Body growth, lethal, lifespan, reproduction behavior, including gonad development and male ratio, cytotoxicity on germ cells, expression of genes related to reduced body surface area, shortened lifespan, germ cell apoptosis, and cell cycle arrest      | L1 to L4   | Liquid medium               | PFOS       | Wild-type Bristol N2 strain                                                                                          | [33] |

|                                                                                                                                                      |          |                    |             |                                                                                                                                                                                                                  |      |
|------------------------------------------------------------------------------------------------------------------------------------------------------|----------|--------------------|-------------|------------------------------------------------------------------------------------------------------------------------------------------------------------------------------------------------------------------|------|
| Reproduction behavior, lethal, lifespan reproductive ability including sperm number, sperm cell morphology and size, and sperm activation            | L1 to L4 | Agar growth medium | PFOS, PFOA  | Wild-type Bristol N2 strain; <i>him-5 (e1490)</i> , <i>fog-2 (q71)</i> , <i>spe-4 (hc78)</i> , <i>spe-4 (hc93)</i> , <i>spe-6 (hc163)</i> , <i>spe-10 (hc104)</i> , <i>fer-1 (hc1)</i> , <i>swm-1 (me66)</i>     | [34] |
| Reproduction, pumping rate, development inhibition, locomotive activity change, body size, growth rate, and bioaccumulation                          | L1 to L4 | Liquid medium      | PFOS, PFBS  | Wild-type Bristol N2 strain; <i>DH1033 (sqt-1 (sc103) II; bls1 X)</i>                                                                                                                                            | [35] |
| Bioaccumulation, neurodegeneration, expression of neuro system and antioxidant-related genes, cytotoxicity effects, cell mitosis, and motor behavior | L1       | Liquid medium      | PFOS, PFOA  | wild-type Bristol N2 strain; BZ555 ( <i>egls1[dat-1p::GFP]</i> ), CZ1632 ( <i>juls76 [unc-25p::GFP + lin-15(+)]</i> ), GR1366 ( <i>mgIs42 [tph-1::GFP + rol-6(su1006)]</i> ), LX929 ( <i>vsIs[unv-17::GFP]</i> ) | [36] |
| Transgenerational fat storage, lipid metabolism, and gene expression profiles                                                                        | F0 to F3 | Agar growth medium | PFOA        | Wild-type Bristol N2 strain; <i>daf-2</i> mutant                                                                                                                                                                 | [39] |
| Immune response gene expression, bioaccumulation, and lethal                                                                                         | L1 to L4 | Agar growth medium | PFOS, PFHxS | Wild-type Bristol N2 strain                                                                                                                                                                                      | [40] |
